# Supplementary figures and images for: Antidiabetic Activity and In Silico Molecular Docking of Polyphenols from Ammannia baccifera L. subsp. Aegyptiaca (Willd.) Koehne Waste: Structure Elucidation of Undescribed Acylated Flavonol Diglucoside
Source: MDPI journal article supplement (doi:10.3390/plants11030452), 2022-02-06

$^1\text{H}$  NMR of Compound (1)

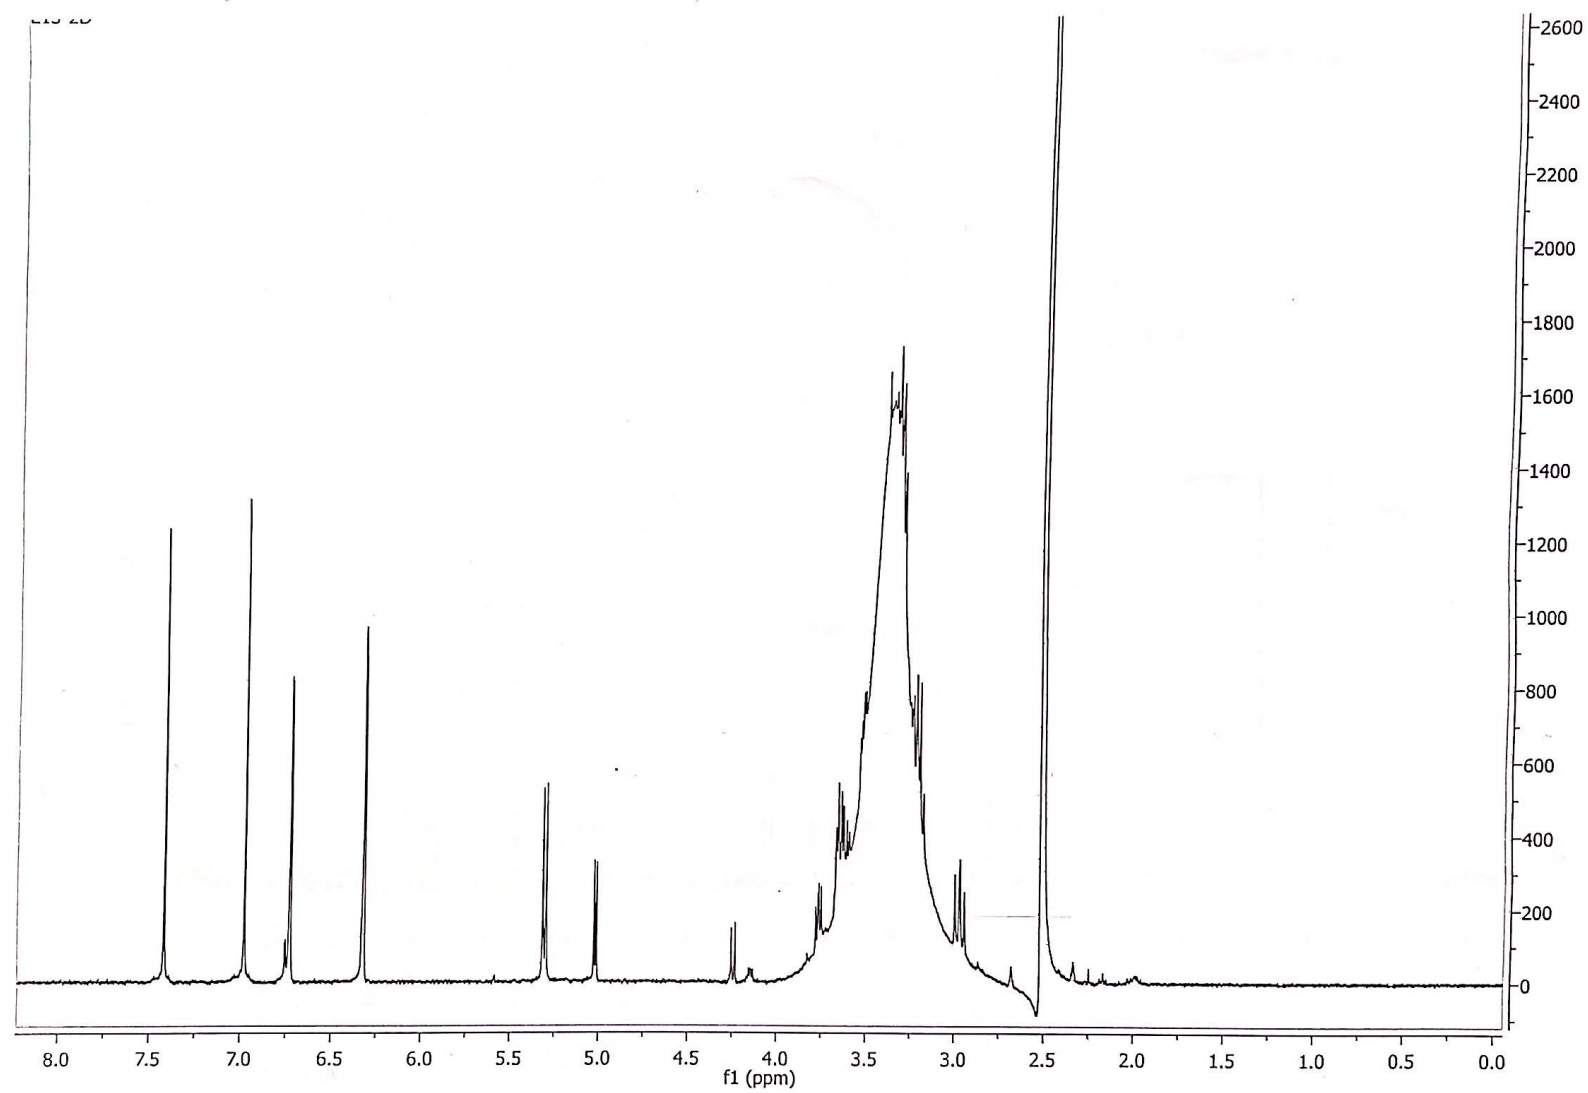

$^{13}\text{C}$  NMR of Compound (1)

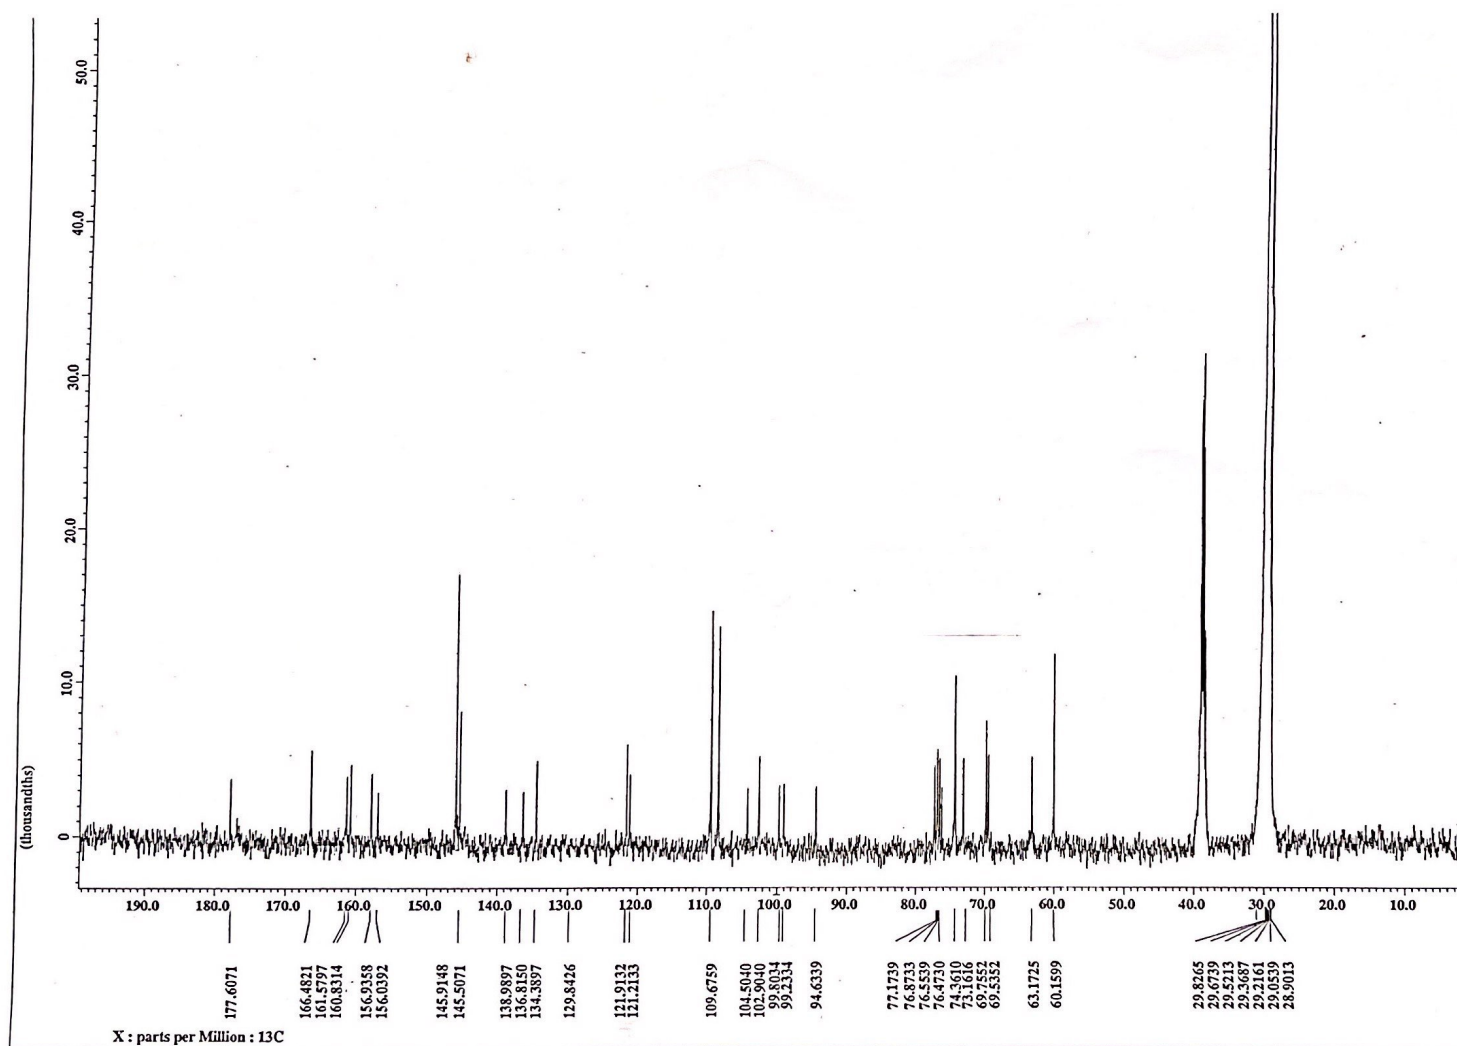

HMBC of Compound (1)

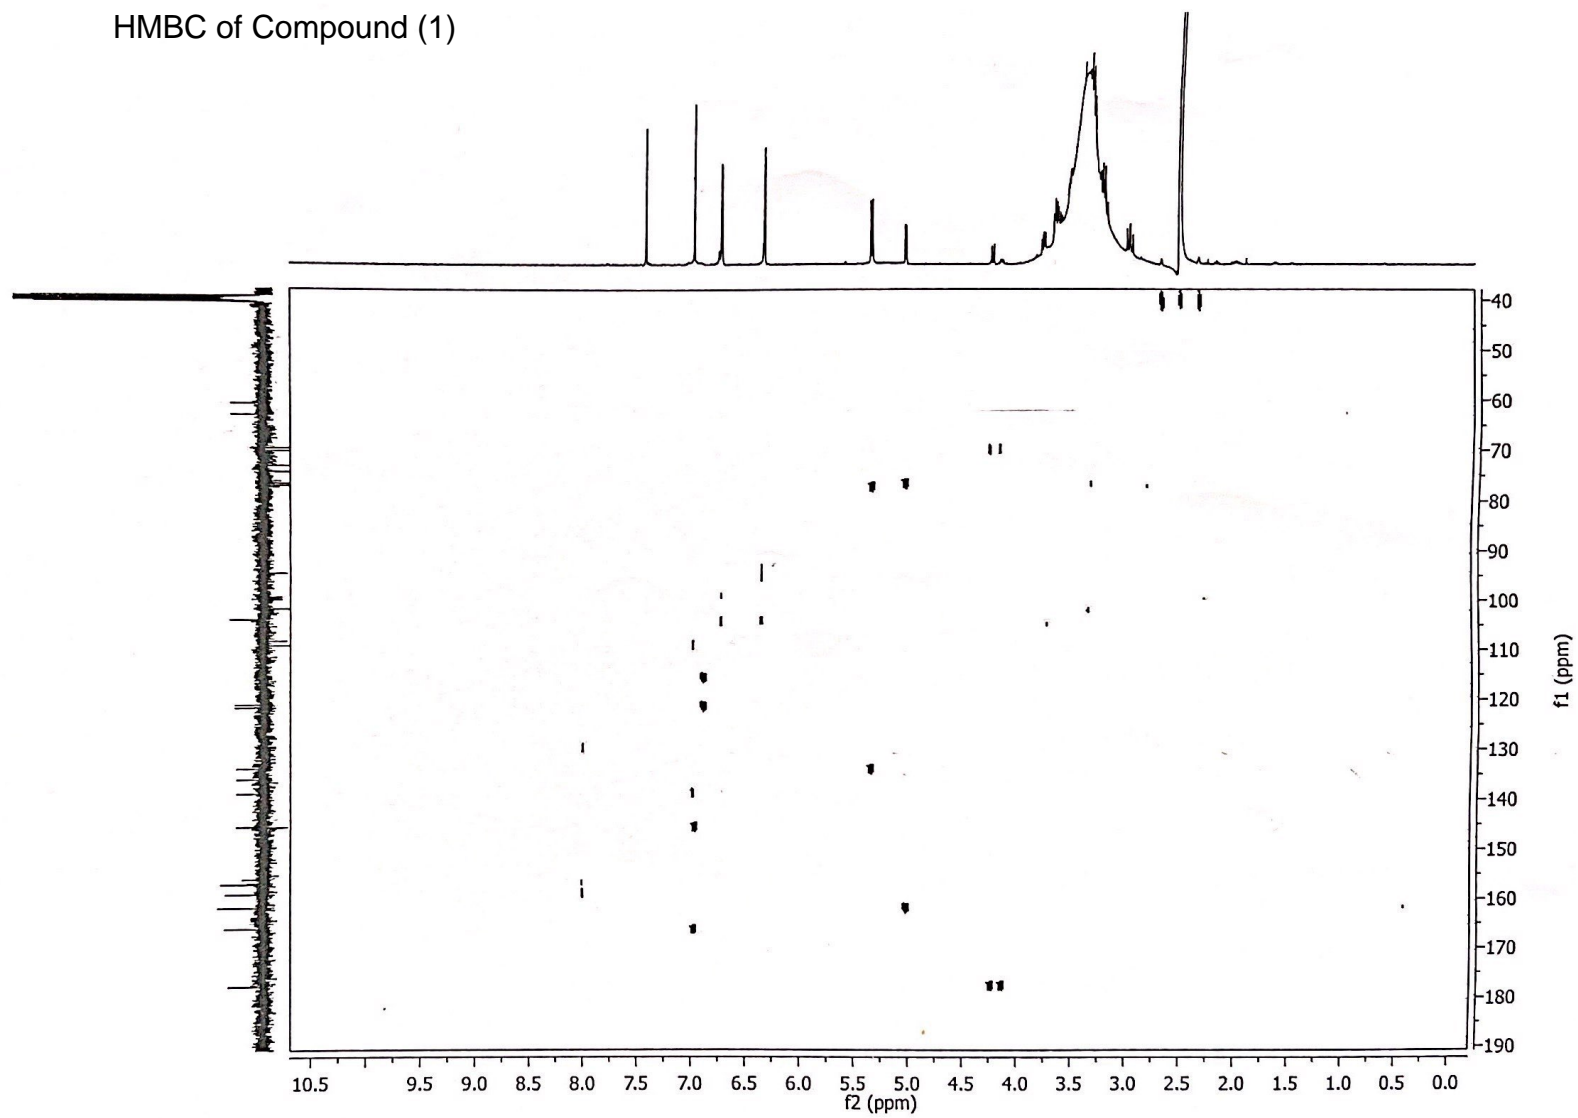

HSQC of Compound (1)

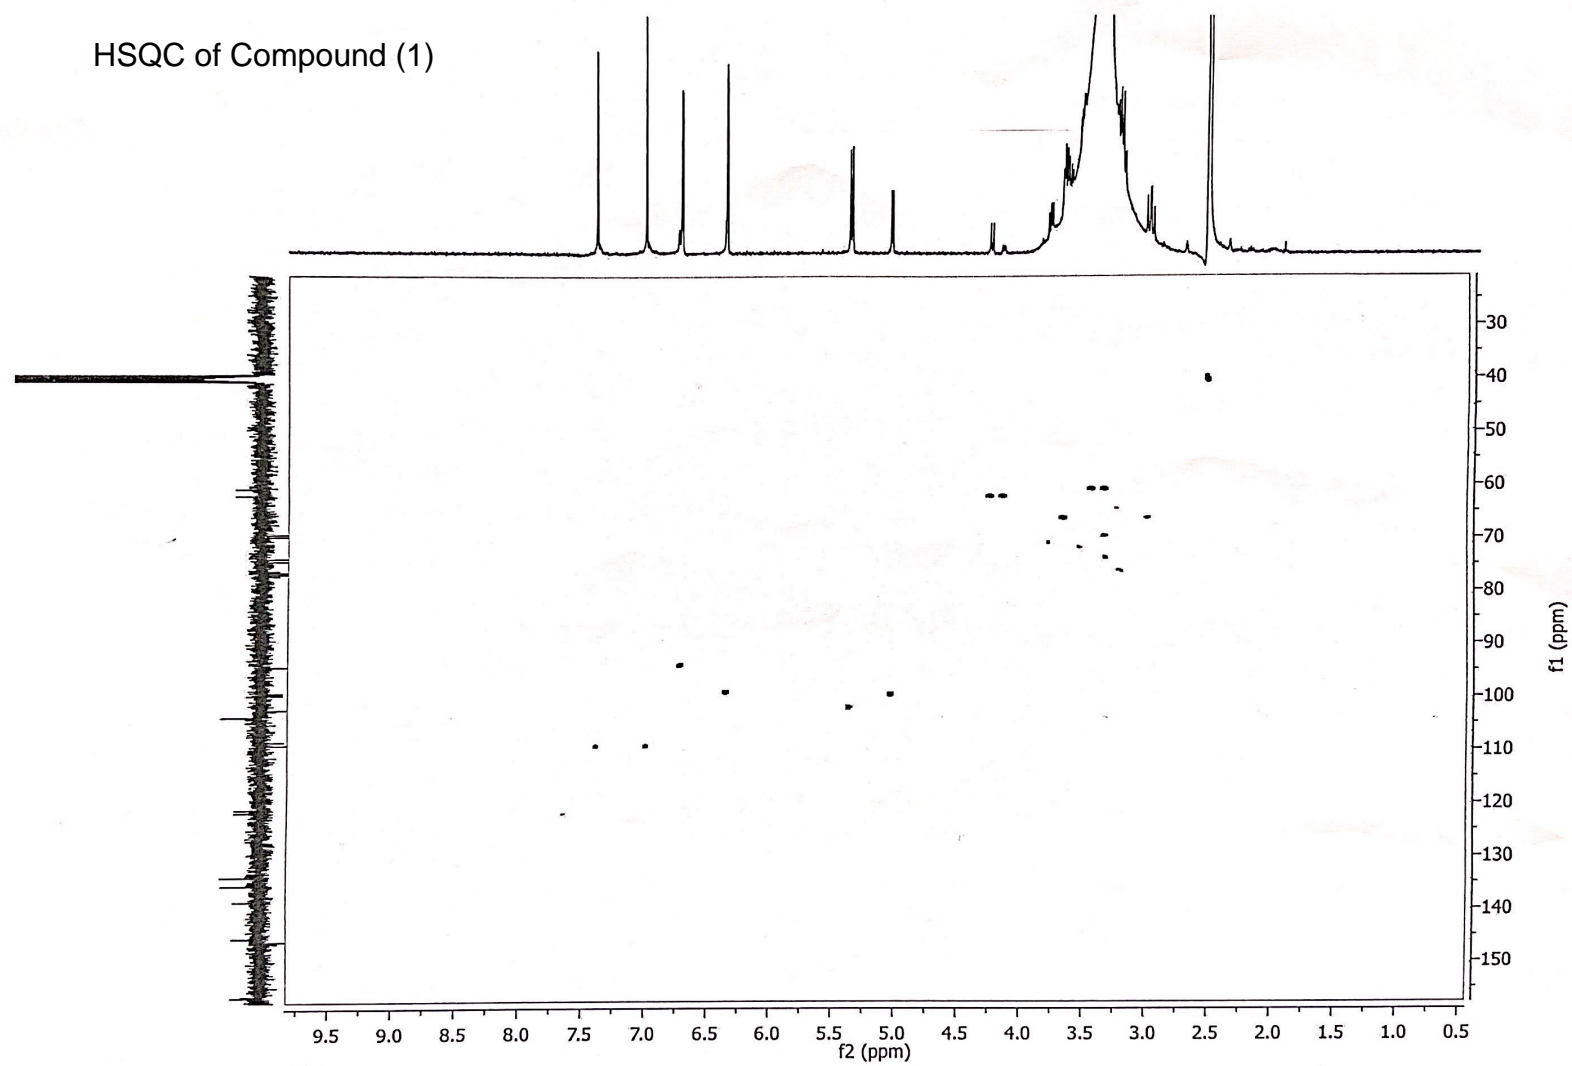

# ESI MS of Compound (1)

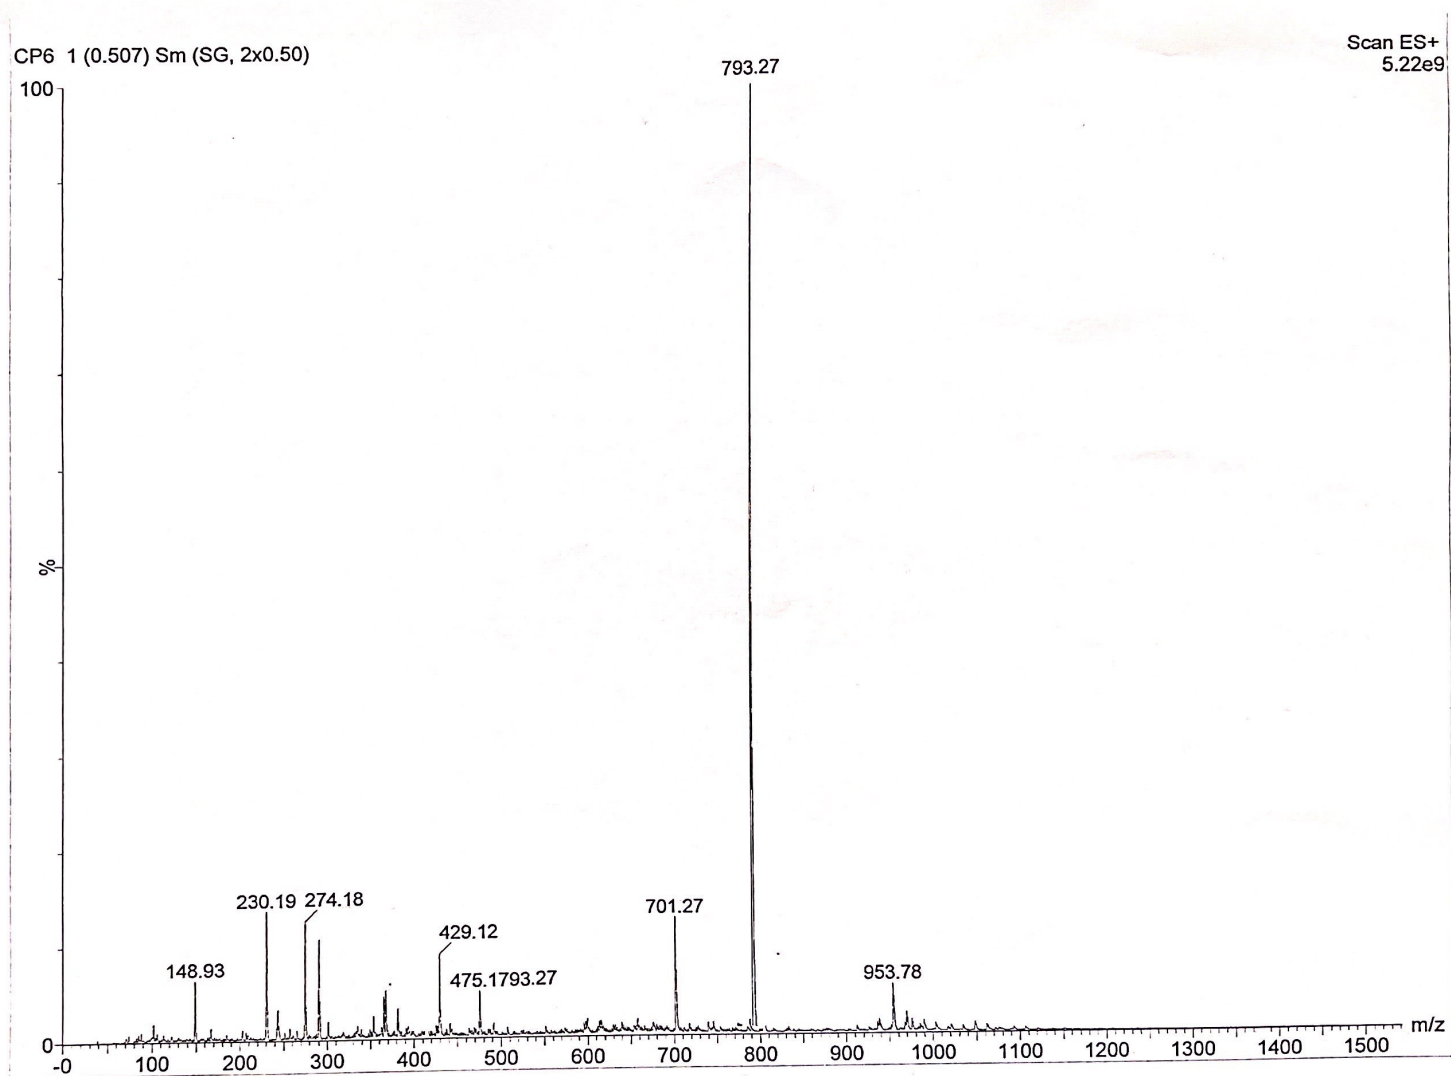

Supplement: s1 [file s1]
